# Supplementary material
Source: publisher figshare collection journal article supplement (https://asha.figshare.com/ndownloader/files/34804672)
Supplement: Supplementary file 1 [file 34804672]

**Participant SLP Name:** \_\_\_\_\_

Test Start Time: \_\_\_\_\_ Test Finish Time: \_\_\_\_\_

**Participant SLP Role:**

☐ Live administrator

☐ Telehealth

Zoom PW: \_\_\_\_\_

**Participant:** Child

Date: \_\_\_\_\_

- 1) Prior to Starting Testing: Test connection at: **speedtest.net**
- 2) Device being used by **Telehealth SLP**: \_\_\_\_\_  
Record DOWNload speed: \_\_\_\_\_  
\*\* notify LIVE SLP if download speed is less than 20
- 4) iPad 1 PW: \_\_\_\_\_ Record DOWNload speed: \_\_\_\_\_
- 5) iPad 2 PW: \_\_\_\_\_ Record DOWNload speed: \_\_\_\_\_
- 6) **LIVE SLP: set up a group text with the telehealth SLPs** ☐
- 7) **SLP Headphones tested** : ☐ audio  
\*\* bottom left, MUTE, arrow UP : "Test Speakers and Microphone..."  
OR
- 8) **Child Participant Headphones tested** ☐ microphone  
Have child talk into microphone and both SLPs respond they can hear the child
- 9) **LIVE SLP** iPads are set at USE ORIGINAL SOUND (before logging in, Settings>Meeting Settings> Use Original Sound ☐ iPad 1 ☐ iPad 2
- 10) Additional adult participant for the live administration ☐ yes ☐ no
- 11) **LIVE SLP administrator plugged child participant's headphones into iPad with Zoom**  
pin# \_\_\_\_\_

**Username: debbierec@tampabay.rr.com**

Password: Boomer63

Telehealth SLP 1 will use:

Join Zoom Meeting

<https://us04web.zoom.us/j/8208367539?pwd=TW0rbIpPdGdBZHBwamZsbjA3YktOUT09>

Meeting ID: 820 836 7539

Passcode(PW): 6RiNwV

**Username: superiorthrapyCR@tampabay.rr.com**

Password: Boomer63

Telehealth SLP 2 will use:

Join Zoom Meeting

<https://us02web.zoom.us/j/3377908889?pwd=cDIgGdXBseWJlVzZlZWElvdU0wWUJSZz09>

Meeting ID: 337 790 8889

Passcode(PW): 473670

**LIVE SLP had to come out behind the barrier during administration to manage child behaviors:**

☐ yes ☐ no

## Sounds-in-Words: All Ages

### Items 1–2 (p.1)

#### What is this?

This is a house. It is where some people live. What is this?

#### What is this?

This is a door. You use it to go in and out. What is this?

### Item 3 (p. 2)

#### What is this?

This is a pig. It says oink. What is this?

### Item 4 (p. 3)

#### What is this?

This is a cup. You can drink from it. What is this?

### Item 5 (p. 4)

#### She is a girl and he is a \_\_\_\_?

He is a boy. He is not a girl. What is he?

### Item 6 (p. 5)

#### What is this?

This is an apple. It is red and crunchy. What fruit is this?

### Item 7 (p. 6)

#### Red means stop and green means \_\_\_\_.

Green means go. It means to start moving. Red means stop and green means \_\_\_\_.

### Item 8-9 (p.7)

#### What is this?

This is a duck. It swims in the water. What is this?

#### What sound does a duck make?

A duck says quack. It's a funny sound. What does a duck say?

### Item 10 (p. 8)

#### What is this?

This is a table. You can eat here. What is this?

### Item 11 (p.9)

#### What is this?

This is a monkey. It is furry. What is this?

### Item 12(p.10)

#### What is this?

This is a hammer. You use it to pound things. What is this?

|                                                                                    |                                 |                                         |
|------------------------------------------------------------------------------------|---------------------------------|-----------------------------------------|
| <b>house</b> <input type="checkbox"/> correct <input type="checkbox"/> unscorable  | repeat                          | video loss, brief                       |
|                                                                                    | verbal stimuli prompt           | audio loss, brief                       |
|                                                                                    | child compromised audio signal  | less than 5 sec total transmission loss |
|                                                                                    | child compromised visual signal | more than 5 sec total transmission loss |
| <b>door</b> <input type="checkbox"/> correct <input type="checkbox"/> unscorable   | repeat                          | video loss, brief                       |
|                                                                                    | verbal stimuli prompt           | audio loss, brief                       |
|                                                                                    | child compromised audio signal  | less than 5 sec total transmission loss |
|                                                                                    | child compromised visual signal | more than 5 sec total transmission loss |
| <b>pig</b> <input type="checkbox"/> correct <input type="checkbox"/> unscorable    | repeat                          | video loss, brief                       |
|                                                                                    | verbal stimuli prompt           | audio loss, brief                       |
|                                                                                    | child compromised audio signal  | less than 5 sec total transmission loss |
|                                                                                    | child compromised visual signal | more than 5 sec total transmission loss |
| <b>cup</b> <input type="checkbox"/> correct <input type="checkbox"/> unscorable    | repeat                          | video loss, brief                       |
|                                                                                    | verbal stimuli prompt           | audio loss, brief                       |
|                                                                                    | child compromised audio signal  | less than 5 sec total transmission loss |
|                                                                                    | child compromised visual signal | more than 5 sec total transmission loss |
| <b>boy</b> <input type="checkbox"/> correct <input type="checkbox"/> unscorable    | repeat                          | video loss, brief                       |
|                                                                                    | verbal stimuli prompt           | audio loss, brief                       |
|                                                                                    | child compromised audio signal  | less than 5 sec total transmission loss |
|                                                                                    | child compromised visual signal | more than 5 sec total transmission loss |
| <b>apple</b> <input type="checkbox"/> correct <input type="checkbox"/> unscorable  | repeat                          | video loss, brief                       |
|                                                                                    | verbal stimuli prompt           | audio loss, brief                       |
|                                                                                    | child compromised audio signal  | less than 5 sec total transmission loss |
|                                                                                    | child compromised visual signal | more than 5 sec total transmission loss |
| <b>go</b> <input type="checkbox"/> correct <input type="checkbox"/> unscorable     | repeat                          | video loss, brief                       |
|                                                                                    | verbal stimuli prompt           | audio loss, brief                       |
|                                                                                    | child compromised audio signal  | less than 5 sec total transmission loss |
|                                                                                    | child compromised visual signal | more than 5 sec total transmission loss |
| <b>duck</b> <input type="checkbox"/> correct <input type="checkbox"/> unscorable   | repeat                          | video loss, brief                       |
|                                                                                    | verbal stimuli prompt           | audio loss, brief                       |
|                                                                                    | child compromised audio signal  | less than 5 sec total transmission loss |
|                                                                                    | child compromised visual signal | more than 5 sec total transmission loss |
| <b>quack</b> <input type="checkbox"/> correct <input type="checkbox"/> unscorable  | repeat                          | video loss, brief                       |
|                                                                                    | verbal stimuli prompt           | audio loss, brief                       |
|                                                                                    | child compromised audio signal  | less than 5 sec total transmission loss |
|                                                                                    | child compromised visual signal | more than 5 sec total transmission loss |
| <b>table</b> <input type="checkbox"/> correct <input type="checkbox"/> unscorable  | repeat                          | video loss, brief                       |
|                                                                                    | verbal stimuli prompt           | audio loss, brief                       |
|                                                                                    | child compromised audio signal  | less than 5 sec total transmission loss |
|                                                                                    | child compromised visual signal | more than 5 sec total transmission loss |
| <b>monkey</b> <input type="checkbox"/> correct <input type="checkbox"/> unscorable | repeat                          | video loss, brief                       |
|                                                                                    | verbal stimuli prompt           | audio loss, brief                       |
|                                                                                    | child compromised audio signal  | less than 5 sec total transmission loss |
|                                                                                    | child compromised visual signal | more than 5 sec total transmission loss |
| <b>hammer</b> <input type="checkbox"/> correct <input type="checkbox"/> unscorable | repeat                          | video loss, brief                       |
|                                                                                    | verbal stimuli prompt           | audio loss, brief                       |
|                                                                                    | child compromised audio signal  | less than 5 sec total transmission loss |
|                                                                                    | child compromised visual signal | more than 5 sec total transmission loss |

## Sounds-in-Words: All Ages

### Item 13(p.11)

#### What is this?

This is a fish. It lives in the water. What is this?

|                                                                      |                                 |                                         |
|----------------------------------------------------------------------|---------------------------------|-----------------------------------------|
| <b>fish</b> f i sh                                                   | repeat                          | video loss, brief                       |
| <input type="checkbox"/> correct <input type="checkbox"/> unscorable | verbal stimuli prompt           | audio loss, brief                       |
|                                                                      | child compromised audio signal  | less than 5 sec total transmission loss |
|                                                                      | child compromised visual signal | more than 5 sec total transmission loss |

### Item 14(p.12)

#### What is this?

This is a watch. It tells time. What is this?

|                                                                      |                                 |                                         |
|----------------------------------------------------------------------|---------------------------------|-----------------------------------------|
| <b>watch</b> w a tch                                                 | repeat                          | video loss, brief                       |
| <input type="checkbox"/> correct <input type="checkbox"/> unscorable | verbal stimuli prompt           | audio loss, brief                       |
|                                                                      | child compromised audio signal  | less than 5 sec total transmission loss |
|                                                                      | child compromised visual signal | more than 5 sec total transmission loss |

### Item 15-16(p.13)

#### What is this?

This is a spider. It has eight legs. What is this?

|                                                                      |                                 |                                         |
|----------------------------------------------------------------------|---------------------------------|-----------------------------------------|
| <b>spider</b> s p i d e r                                            | repeat                          | video loss, brief                       |
| <input type="checkbox"/> correct <input type="checkbox"/> unscorable | verbal stimuli prompt           | audio loss, brief                       |
|                                                                      | child compromised audio signal  | less than 5 sec total transmission loss |
|                                                                      | child compromised visual signal | more than 5 sec total transmission loss |

#### What is this?

This is a web. It is made of sticky thread. What is this?

|                                                                      |                                 |                                         |
|----------------------------------------------------------------------|---------------------------------|-----------------------------------------|
| <b>web</b> w e b                                                     | repeat                          | video loss, brief                       |
| <input type="checkbox"/> correct <input type="checkbox"/> unscorable | verbal stimuli prompt           | audio loss, brief                       |
|                                                                      | child compromised audio signal  | less than 5 sec total transmission loss |
|                                                                      | child compromised visual signal | more than 5 sec total transmission loss |

### Item 17(p.14)

#### What is this?

This is a drum. You can make a loud noise with it. What is this?

|                                                                      |                                 |                                         |
|----------------------------------------------------------------------|---------------------------------|-----------------------------------------|
| <b>drum</b> d r u m                                                  | repeat                          | video loss, brief                       |
| <input type="checkbox"/> correct <input type="checkbox"/> unscorable | verbal stimuli prompt           | audio loss, brief                       |
|                                                                      | child compromised audio signal  | less than 5 sec total transmission loss |
|                                                                      | child compromised visual signal | more than 5 sec total transmission loss |

### Item 18-19(p.15)

#### What is this?

This is a plate. You put food on it. What is this?

|                                                                      |                                 |                                         |
|----------------------------------------------------------------------|---------------------------------|-----------------------------------------|
| <b>plate</b> p l a t e                                               | repeat                          | video loss, brief                       |
| <input type="checkbox"/> correct <input type="checkbox"/> unscorable | verbal stimuli prompt           | audio loss, brief                       |
|                                                                      | child compromised audio signal  | less than 5 sec total transmission loss |
|                                                                      | child compromised visual signal | more than 5 sec total transmission loss |

#### What is this?

This is a knife. You use it to cut food. What is this?

|                                                                      |                                 |                                         |
|----------------------------------------------------------------------|---------------------------------|-----------------------------------------|
| <b>knife</b> n a i f e                                               | repeat                          | video loss, brief                       |
| <input type="checkbox"/> correct <input type="checkbox"/> unscorable | verbal stimuli prompt           | audio loss, brief                       |
|                                                                      | child compromised audio signal  | less than 5 sec total transmission loss |
|                                                                      | child compromised visual signal | more than 5 sec total transmission loss |

### Item 20(p.16)

#### What is the boy wearing on his foot?

This is a shoe. It is on the boy's foot. What is this?

|                                                                      |                                 |                                         |
|----------------------------------------------------------------------|---------------------------------|-----------------------------------------|
| <b>shoe</b> s h o e                                                  | repeat                          | video loss, brief                       |
| <input type="checkbox"/> correct <input type="checkbox"/> unscorable | verbal stimuli prompt           | audio loss, brief                       |
|                                                                      | child compromised audio signal  | less than 5 sec total transmission loss |
|                                                                      | child compromised visual signal | more than 5 sec total transmission loss |

### Item 21-22(p.17)

#### What is this?

This is a slide. You can go down it. What is this?

|                                                                      |                                 |                                         |
|----------------------------------------------------------------------|---------------------------------|-----------------------------------------|
| <b>slide</b> s l i d e                                               | repeat                          | video loss, brief                       |
| <input type="checkbox"/> correct <input type="checkbox"/> unscorable | verbal stimuli prompt           | audio loss, brief                       |
|                                                                      | child compromised audio signal  | less than 5 sec total transmission loss |
|                                                                      | child compromised visual signal | more than 5 sec total transmission loss |

#### What is this?

This is a swing. You can go back and forth on it. What is this?

|                                                                      |                                 |                                         |
|----------------------------------------------------------------------|---------------------------------|-----------------------------------------|
| <b>swing</b> s w i n g                                               | repeat                          | video loss, brief                       |
| <input type="checkbox"/> correct <input type="checkbox"/> unscorable | verbal stimuli prompt           | audio loss, brief                       |
|                                                                      | child compromised audio signal  | less than 5 sec total transmission loss |
|                                                                      | child compromised visual signal | more than 5 sec total transmission loss |

### Item 23(p.18)

#### What is this?

This is a guitar. It has strings and you play it. What is this?

|                                                                      |                                 |                                         |
|----------------------------------------------------------------------|---------------------------------|-----------------------------------------|
| <b>guitar</b> g u i t a r                                            | repeat                          | video loss, brief                       |
| <input type="checkbox"/> correct <input type="checkbox"/> unscorable | verbal stimuli prompt           | audio loss, brief                       |
|                                                                      | child compromised audio signal  | less than 5 sec total transmission loss |
|                                                                      | child compromised visual signal | more than 5 sec total transmission loss |

### Item 24(p.19)

#### What is this?

This is a lion. It roars very loudly. What is this?

|                                                                      |                                 |                                         |
|----------------------------------------------------------------------|---------------------------------|-----------------------------------------|
| <b>lion</b> l i o n                                                  | repeat                          | video loss, brief                       |
| <input type="checkbox"/> correct <input type="checkbox"/> unscorable | verbal stimuli prompt           | audio loss, brief                       |
|                                                                      | child compromised audio signal  | less than 5 sec total transmission loss |
|                                                                      | child compromised visual signal | more than 5 sec total transmission loss |

## Sounds-in-Words: All Ages

### Item 25(p.20)

#### What is this?

This is a chair. You sit on it. What is this?

|                                                                      |  |                                 |  |                                         |
|----------------------------------------------------------------------|--|---------------------------------|--|-----------------------------------------|
| <b>chair</b> tʃ   e   r                                              |  | repeat                          |  | video loss, brief                       |
| <input type="checkbox"/> correct <input type="checkbox"/> unscorable |  | verbal stimuli prompt           |  | audio loss, brief                       |
|                                                                      |  | child compromised audio signal  |  | less than 5 sec total transmission loss |
|                                                                      |  | child compromised visual signal |  | more than 5 sec total transmission loss |

### Item 26(p.21)

#### What is this?

This is soap. You wash your hands with it. What is this?

|                                                                      |  |                                 |  |                                         |
|----------------------------------------------------------------------|--|---------------------------------|--|-----------------------------------------|
| <b>soap</b> s   o   p                                                |  | repeat                          |  | video loss, brief                       |
| <input type="checkbox"/> correct <input type="checkbox"/> unscorable |  | verbal stimuli prompt           |  | audio loss, brief                       |
|                                                                      |  | child compromised audio signal  |  | less than 5 sec total transmission loss |
|                                                                      |  | child compromised visual signal |  | more than 5 sec total transmission loss |

### Item 27(p.22)

#### What are these?

These are glasses. They help some people see better. What are these?

|                                                                      |  |                                 |  |                                         |
|----------------------------------------------------------------------|--|---------------------------------|--|-----------------------------------------|
| <b>glasses</b> g   l   æ   s   z                                     |  | repeat                          |  | video loss, brief                       |
| <input type="checkbox"/> correct <input type="checkbox"/> unscorable |  | verbal stimuli prompt           |  | audio loss, brief                       |
|                                                                      |  | child compromised audio signal  |  | less than 5 sec total transmission loss |
|                                                                      |  | child compromised visual signal |  | more than 5 sec total transmission loss |

### Item 28(p.23)

#### What is this?

This is a tiger. It is orange with black stripes. What is this?

|                                                                      |  |                                 |  |                                         |
|----------------------------------------------------------------------|--|---------------------------------|--|-----------------------------------------|
| <b>tiger</b> t   æ   g   e                                           |  | repeat                          |  | video loss, brief                       |
| <input type="checkbox"/> correct <input type="checkbox"/> unscorable |  | verbal stimuli prompt           |  | audio loss, brief                       |
|                                                                      |  | child compromised audio signal  |  | less than 5 sec total transmission loss |
|                                                                      |  | child compromised visual signal |  | more than 5 sec total transmission loss |

### Item 29(p.24)

#### What is this?

This is a puzzle. It is fun to put together. What is this?

|                                                                      |  |                                 |  |                                         |
|----------------------------------------------------------------------|--|---------------------------------|--|-----------------------------------------|
| <b>puzzle</b> p   ʌ   z   ə   l                                      |  | repeat                          |  | video loss, brief                       |
| <input type="checkbox"/> correct <input type="checkbox"/> unscorable |  | verbal stimuli prompt           |  | audio loss, brief                       |
|                                                                      |  | child compromised audio signal  |  | less than 5 sec total transmission loss |
|                                                                      |  | child compromised visual signal |  | more than 5 sec total transmission loss |

### Item 30-32 (p.25)

#### What is this?

This is a finger. You can point with it. What is this?

|                                                                      |  |                                 |  |                                         |
|----------------------------------------------------------------------|--|---------------------------------|--|-----------------------------------------|
| <b>finger</b> f   ɪ   ŋ   g   e                                      |  | repeat                          |  | video loss, brief                       |
| <input type="checkbox"/> correct <input type="checkbox"/> unscorable |  | verbal stimuli prompt           |  | audio loss, brief                       |
|                                                                      |  | child compromised audio signal  |  | less than 5 sec total transmission loss |
|                                                                      |  | child compromised visual signal |  | more than 5 sec total transmission loss |

#### What is this?

This is a ring. It is shiny. What is this?

|                                                                      |  |                                 |  |                                         |
|----------------------------------------------------------------------|--|---------------------------------|--|-----------------------------------------|
| <b>ring</b> r   ɪ   ŋ                                                |  | repeat                          |  | video loss, brief                       |
| <input type="checkbox"/> correct <input type="checkbox"/> unscorable |  | verbal stimuli prompt           |  | audio loss, brief                       |
|                                                                      |  | child compromised audio signal  |  | less than 5 sec total transmission loss |
|                                                                      |  | child compromised visual signal |  | more than 5 sec total transmission loss |

#### What is this?

This is a thumb. It is part of a hand. What is this?

|                                                                      |  |                                 |  |                                         |
|----------------------------------------------------------------------|--|---------------------------------|--|-----------------------------------------|
| <b>thumb</b> θ   ʌ   m                                               |  | repeat                          |  | video loss, brief                       |
| <input type="checkbox"/> correct <input type="checkbox"/> unscorable |  | verbal stimuli prompt           |  | audio loss, brief                       |
|                                                                      |  | child compromised audio signal  |  | less than 5 sec total transmission loss |
|                                                                      |  | child compromised visual signal |  | more than 5 sec total transmission loss |

### Item 33(p.26)

#### What is this?

This is an elephant. It has a long nose. What is this?

|                                                                      |  |                                 |  |                                         |
|----------------------------------------------------------------------|--|---------------------------------|--|-----------------------------------------|
| <b>elephant</b> e   l   ə   f   ə   n   t                            |  | repeat                          |  | video loss, brief                       |
| <input type="checkbox"/> correct <input type="checkbox"/> unscorable |  | verbal stimuli prompt           |  | audio loss, brief                       |
|                                                                      |  | child compromised audio signal  |  | less than 5 sec total transmission loss |
|                                                                      |  | child compromised visual signal |  | more than 5 sec total transmission loss |

### Item 34(p.27)

#### What is this?

This is a vacuum. It is used to clean floors. What is this?

|                                                                      |  |                                 |  |                                         |
|----------------------------------------------------------------------|--|---------------------------------|--|-----------------------------------------|
| <b>vacuum</b> v   æ   k   j   u   m                                  |  | repeat                          |  | video loss, brief                       |
| <input type="checkbox"/> correct <input type="checkbox"/> unscorable |  | verbal stimuli prompt           |  | audio loss, brief                       |
|                                                                      |  | child compromised audio signal  |  | less than 5 sec total transmission loss |
|                                                                      |  | child compromised visual signal |  | more than 5 sec total transmission loss |

### Item 35(p.28)

#### What is this?

This is a shovel. You use it to scoop dirt. What is this?

|                                                                      |  |                                 |  |                                         |
|----------------------------------------------------------------------|--|---------------------------------|--|-----------------------------------------|
| <b>shovel</b> ʃ   ʌ   v   ə   l                                      |  | repeat                          |  | video loss, brief                       |
| <input type="checkbox"/> correct <input type="checkbox"/> unscorable |  | verbal stimuli prompt           |  | audio loss, brief                       |
|                                                                      |  | child compromised audio signal  |  | less than 5 sec total transmission loss |
|                                                                      |  | child compromised visual signal |  | more than 5 sec total transmission loss |

### Item 36(p.29)

This person teaches. A person who teaches is a....?

She is a teacher. She has many students. A person who teaches is a \_\_\_\_\_.

|                                                                      |  |                                 |  |                                         |
|----------------------------------------------------------------------|--|---------------------------------|--|-----------------------------------------|
| <b>teacher</b> t   i   tʃ   e                                        |  | repeat                          |  | video loss, brief                       |
| <input type="checkbox"/> correct <input type="checkbox"/> unscorable |  | verbal stimuli prompt           |  | audio loss, brief                       |
|                                                                      |  | child compromised audio signal  |  | less than 5 sec total transmission loss |
|                                                                      |  | child compromised visual signal |  | more than 5 sec total transmission loss |

## Sounds-in-Words: All Ages

### Item 37(p.30)

#### What is this?

This is a zebra. It is white with black stripes. What is this?

|                                                                      |                                 |                                         |
|----------------------------------------------------------------------|---------------------------------|-----------------------------------------|
| <b>zebra</b> z   i   b   r   e                                       | repeat                          | video loss, brief                       |
| <input type="checkbox"/> correct <input type="checkbox"/> unscorable | verbal stimuli prompt           | audio loss, brief                       |
|                                                                      | child compromised audio signal  | less than 5 sec total transmission loss |
|                                                                      | child compromised visual signal | more than 5 sec total transmission loss |

### Item 38(p.31)

#### What is this?

This is a giraffe. It has a long neck. What is this?

|                                                                      |                                 |                                         |
|----------------------------------------------------------------------|---------------------------------|-----------------------------------------|
| <b>giraffe</b> dʒ   ə   r   æ   f                                    | repeat                          | video loss, brief                       |
| <input type="checkbox"/> correct <input type="checkbox"/> unscorable | verbal stimuli prompt           | audio loss, brief                       |
|                                                                      | child compromised audio signal  | less than 5 sec total transmission loss |
|                                                                      | child compromised visual signal | more than 5 sec total transmission loss |

### Item 39(p.32)

An apple is a fruit. A carrot is a.....?

A carrot is a vegetable. It is a healthy food. What is this?

|                                                                      |                                 |                                         |
|----------------------------------------------------------------------|---------------------------------|-----------------------------------------|
| <b>vegetable</b> v   ɛ   dʒ   t   ə   b   ə   l                      | repeat                          | video loss, brief                       |
| <input type="checkbox"/> correct <input type="checkbox"/> unscorable | verbal stimuli prompt           | audio loss, brief                       |
|                                                                      | child compromised audio signal  | less than 5 sec total transmission loss |
|                                                                      | child compromised visual signal | more than 5 sec total transmission loss |

### Item 40(p.33)

#### What is she doing?

She is brushing her hair. She is making her hair look neat. What is she doing?

|                                                                      |                                 |                                         |
|----------------------------------------------------------------------|---------------------------------|-----------------------------------------|
| <b>brushing</b> b   r   ʌ   f   ɪ   ŋ                                | repeat                          | video loss, brief                       |
| <input type="checkbox"/> correct <input type="checkbox"/> unscorable | verbal stimuli prompt           | audio loss, brief                       |
|                                                                      | child compromised audio signal  | less than 5 sec total transmission loss |
|                                                                      | child compromised visual signal | more than 5 sec total transmission loss |

### Item 41-42(p.34)

This crayon is red and this crayon is.....?

This crayon is blue. It's the same color as the sky. What color is this?

|                                                                      |                                 |                                         |
|----------------------------------------------------------------------|---------------------------------|-----------------------------------------|
| <b>blue</b> b   l   u                                                | repeat                          | video loss, brief                       |
| <input type="checkbox"/> correct <input type="checkbox"/> unscorable | verbal stimuli prompt           | audio loss, brief                       |
|                                                                      | child compromised audio signal  | less than 5 sec total transmission loss |
|                                                                      | child compromised visual signal | more than 5 sec total transmission loss |

and this crayon is....?

This crayon is yellow. It's the same color as the sun. What color is this?

|                                                                      |                                 |                                         |
|----------------------------------------------------------------------|---------------------------------|-----------------------------------------|
| <b>yellow</b> j   ɛ   l   o                                          | repeat                          | video loss, brief                       |
| <input type="checkbox"/> correct <input type="checkbox"/> unscorable | verbal stimuli prompt           | audio loss, brief                       |
|                                                                      | child compromised audio signal  | less than 5 sec total transmission loss |
|                                                                      | child compromised visual signal | more than 5 sec total transmission loss |

### Item 43(p.35)

Look at the family. She is the sister and he is the ....?He is the brother. He is sitting with his family. Who is he?

|                                                                      |                                 |                                         |
|----------------------------------------------------------------------|---------------------------------|-----------------------------------------|
| <b>brother</b> b   r   ə   ð   ə                                     | repeat                          | video loss, brief                       |
| <input type="checkbox"/> correct <input type="checkbox"/> unscorable | verbal stimuli prompt           | audio loss, brief                       |
|                                                                      | child compromised audio signal  | less than 5 sec total transmission loss |
|                                                                      | child compromised visual signal | more than 5 sec total transmission loss |

### Item 44-45(p.36)

#### What is this?

This is a frog. It hops and says ribbit. What is this?

|                                                                      |                                 |                                         |
|----------------------------------------------------------------------|---------------------------------|-----------------------------------------|
| <b>frog</b> f   r   ɒ   g                                            | repeat                          | video loss, brief                       |
| <input type="checkbox"/> correct <input type="checkbox"/> unscorable | verbal stimuli prompt           | audio loss, brief                       |
|                                                                      | child compromised audio signal  | less than 5 sec total transmission loss |
|                                                                      | child compromised visual signal | more than 5 sec total transmission loss |

#### What is this?

The frog is green. It is the same color as grass. What color is it?

|                                                                      |                                 |                                         |
|----------------------------------------------------------------------|---------------------------------|-----------------------------------------|
| <b>green</b> g   r   i   n                                           | repeat                          | video loss, brief                       |
| <input type="checkbox"/> correct <input type="checkbox"/> unscorable | verbal stimuli prompt           | audio loss, brief                       |
|                                                                      | child compromised audio signal  | less than 5 sec total transmission loss |
|                                                                      | child compromised visual signal | more than 5 sec total transmission loss |

### Item 46(p.37)

Look at the children as they pick the books. The girl says, I don't want this book; I want...

The girl wants that book. She is pointing over there. What book does the girl want?

|                                                                      |                                 |                                         |
|----------------------------------------------------------------------|---------------------------------|-----------------------------------------|
| <b>that</b> ð   æ   t                                                | repeat                          | video loss, brief                       |
| <input type="checkbox"/> correct <input type="checkbox"/> unscorable | verbal stimuli prompt           | audio loss, brief                       |
|                                                                      | child compromised audio signal  | less than 5 sec total transmission loss |
|                                                                      | child compromised visual signal | more than 5 sec total transmission loss |

### Item 47(p.38)

#### What is this?

This is a leaf. It is part of a tree. What is this?

|                                                                      |                                 |                                         |
|----------------------------------------------------------------------|---------------------------------|-----------------------------------------|
| <b>leaf</b> l   i   f                                                | repeat                          | video loss, brief                       |
| <input type="checkbox"/> correct <input type="checkbox"/> unscorable | verbal stimuli prompt           | audio loss, brief                       |
|                                                                      | child compromised audio signal  | less than 5 sec total transmission loss |
|                                                                      | child compromised visual signal | more than 5 sec total transmission loss |

### Item 48(p.39)

#### What is this?

This is a cookie. It is a sweet treat. What is this?

|                                                                      |                                 |                                         |
|----------------------------------------------------------------------|---------------------------------|-----------------------------------------|
| <b>cookie</b> k   ʊ   k   i                                          | repeat                          | video loss, brief                       |
| <input type="checkbox"/> correct <input type="checkbox"/> unscorable | verbal stimuli prompt           | audio loss, brief                       |
|                                                                      | child compromised audio signal  | less than 5 sec total transmission loss |
|                                                                      | child compromised visual signal | more than 5 sec total transmission loss |

## Sounds-in-Words: All Ages

### [Item 49\(p.40\)](#)

#### [What is this?](#)

This is cheese. The mouse likes eating it. What is this?

### [Item 50\(p.41\)](#)

#### [This man is going to sleep. What is he wearing?](#)

He is wearing pajamas. They are comfortable to sleep in. What is he wearing?

### [Item 51\(p.42\)](#)

#### [What are these?](#)

These are teeth. You brush them to keep them clean. What are these?

### [Item 52-53\(p.43\)](#)

#### [He is a king. She is a queen and she is the.](#)

She is the princess. She lives in a castle with the king and queen. Who is she?

### [What is this?](#)

This is a crown. It is made from gold. What is this?

### [Item 54-55\(p.44\)](#)

#### [What is this?](#)

This is a truck. You can drive it. What is this?

### [What color is it?](#)

The truck is red. It is the same color as a strawberry. What color is it?

### [Item 56\(p.45\)](#)

#### [What is inside this container?](#)

It is juice. You can drink it when you are thirsty. What is inside the container?

### [Item 57\(p.46\)](#)

#### [What is this place?](#)

This is the zoo. You can see lots of animals here. What is this place?

### [Item 58-60\(p.47\)](#)

#### [What is this?](#)

This is a star. It shines in the sky at night. What is this?

### [Let's count the stars. 1,2..](#)

I'm going to count. 1, 2, 3, 4, 5, 6, 7. That's a lot of stars. Now you count.

|                                  |                                     |                                 |  |                                         |
|----------------------------------|-------------------------------------|---------------------------------|--|-----------------------------------------|
| <b>cheese</b> t f i z            |                                     | repeat                          |  | video loss, brief                       |
| <input type="checkbox"/> correct | <input type="checkbox"/> unscorable | verbal stimuli prompt           |  | audio loss, brief                       |
|                                  |                                     | child compromised audio signal  |  | less than 5 sec total transmission loss |
|                                  |                                     | child compromised visual signal |  | more than 5 sec total transmission loss |

|                                  |                                     |                                 |  |                                         |
|----------------------------------|-------------------------------------|---------------------------------|--|-----------------------------------------|
| <b>pajamas</b> p e dʒ a m e z    |                                     | repeat                          |  | video loss, brief                       |
| <input type="checkbox"/> correct | <input type="checkbox"/> unscorable | verbal stimuli prompt           |  | audio loss, brief                       |
|                                  |                                     | child compromised audio signal  |  | less than 5 sec total transmission loss |
|                                  |                                     | child compromised visual signal |  | more than 5 sec total transmission loss |

|                                  |                                     |                                 |  |                                         |
|----------------------------------|-------------------------------------|---------------------------------|--|-----------------------------------------|
| <b>teeth</b> t i θ               |                                     | repeat                          |  | video loss, brief                       |
| <input type="checkbox"/> correct | <input type="checkbox"/> unscorable | verbal stimuli prompt           |  | audio loss, brief                       |
|                                  |                                     | child compromised audio signal  |  | less than 5 sec total transmission loss |
|                                  |                                     | child compromised visual signal |  | more than 5 sec total transmission loss |

|                                  |                                     |                                 |  |                                         |
|----------------------------------|-------------------------------------|---------------------------------|--|-----------------------------------------|
| <b>princess</b> p r i n s e s    |                                     | repeat                          |  | video loss, brief                       |
| <input type="checkbox"/> correct | <input type="checkbox"/> unscorable | verbal stimuli prompt           |  | audio loss, brief                       |
|                                  |                                     | child compromised audio signal  |  | less than 5 sec total transmission loss |
|                                  |                                     | child compromised visual signal |  | more than 5 sec total transmission loss |

|                                  |                                     |                                 |  |                                         |
|----------------------------------|-------------------------------------|---------------------------------|--|-----------------------------------------|
| <b>crown</b> k r aʊ n            |                                     | repeat                          |  | video loss, brief                       |
| <input type="checkbox"/> correct | <input type="checkbox"/> unscorable | verbal stimuli prompt           |  | audio loss, brief                       |
|                                  |                                     | child compromised audio signal  |  | less than 5 sec total transmission loss |
|                                  |                                     | child compromised visual signal |  | more than 5 sec total transmission loss |

|                                  |                                     |                                 |  |                                         |
|----------------------------------|-------------------------------------|---------------------------------|--|-----------------------------------------|
| <b>truck</b> t r ʌ k             |                                     | repeat                          |  | video loss, brief                       |
| <input type="checkbox"/> correct | <input type="checkbox"/> unscorable | verbal stimuli prompt           |  | audio loss, brief                       |
|                                  |                                     | child compromised audio signal  |  | less than 5 sec total transmission loss |
|                                  |                                     | child compromised visual signal |  | more than 5 sec total transmission loss |

|                                  |                                     |                                 |  |                                         |
|----------------------------------|-------------------------------------|---------------------------------|--|-----------------------------------------|
| <b>red</b> r e d                 |                                     | repeat                          |  | video loss, brief                       |
| <input type="checkbox"/> correct | <input type="checkbox"/> unscorable | verbal stimuli prompt           |  | audio loss, brief                       |
|                                  |                                     | child compromised audio signal  |  | less than 5 sec total transmission loss |
|                                  |                                     | child compromised visual signal |  | more than 5 sec total transmission loss |

|                                  |                                     |                                 |  |                                         |
|----------------------------------|-------------------------------------|---------------------------------|--|-----------------------------------------|
| <b>juice</b> dʒ u s              |                                     | repeat                          |  | video loss, brief                       |
| <input type="checkbox"/> correct | <input type="checkbox"/> unscorable | verbal stimuli prompt           |  | audio loss, brief                       |
|                                  |                                     | child compromised audio signal  |  | less than 5 sec total transmission loss |
|                                  |                                     | child compromised visual signal |  | more than 5 sec total transmission loss |

|                                  |                                     |                                 |  |                                         |
|----------------------------------|-------------------------------------|---------------------------------|--|-----------------------------------------|
| <b>zoo</b> z u                   |                                     | repeat                          |  | video loss, brief                       |
| <input type="checkbox"/> correct | <input type="checkbox"/> unscorable | verbal stimuli prompt           |  | audio loss, brief                       |
|                                  |                                     | child compromised audio signal  |  | less than 5 sec total transmission loss |
|                                  |                                     | child compromised visual signal |  | more than 5 sec total transmission loss |

|                                  |                                     |                                 |  |                                         |
|----------------------------------|-------------------------------------|---------------------------------|--|-----------------------------------------|
| <b>star</b> s t a r              |                                     | repeat                          |  | video loss, brief                       |
| <input type="checkbox"/> correct | <input type="checkbox"/> unscorable | verbal stimuli prompt           |  | audio loss, brief                       |
|                                  |                                     | child compromised audio signal  |  | less than 5 sec total transmission loss |
|                                  |                                     | child compromised visual signal |  | more than 5 sec total transmission loss |

|                                  |                                     |                                 |  |                                         |
|----------------------------------|-------------------------------------|---------------------------------|--|-----------------------------------------|
| <b>five</b> f aɪ v               |                                     | repeat                          |  | video loss, brief                       |
| <input type="checkbox"/> correct | <input type="checkbox"/> unscorable | verbal stimuli prompt           |  | audio loss, brief                       |
|                                  |                                     | child compromised audio signal  |  | less than 5 sec total transmission loss |
|                                  |                                     | child compromised visual signal |  | more than 5 sec total transmission loss |

|                                  |                                     |                                 |  |                                         |
|----------------------------------|-------------------------------------|---------------------------------|--|-----------------------------------------|
| <b>seven</b> s e v e n           |                                     | repeat                          |  | video loss, brief                       |
| <input type="checkbox"/> correct | <input type="checkbox"/> unscorable | verbal stimuli prompt           |  | audio loss, brief                       |
|                                  |                                     | child compromised audio signal  |  | less than 5 sec total transmission loss |
|                                  |                                     | child compromised visual signal |  | more than 5 sec total transmission loss |

Additional Notes:



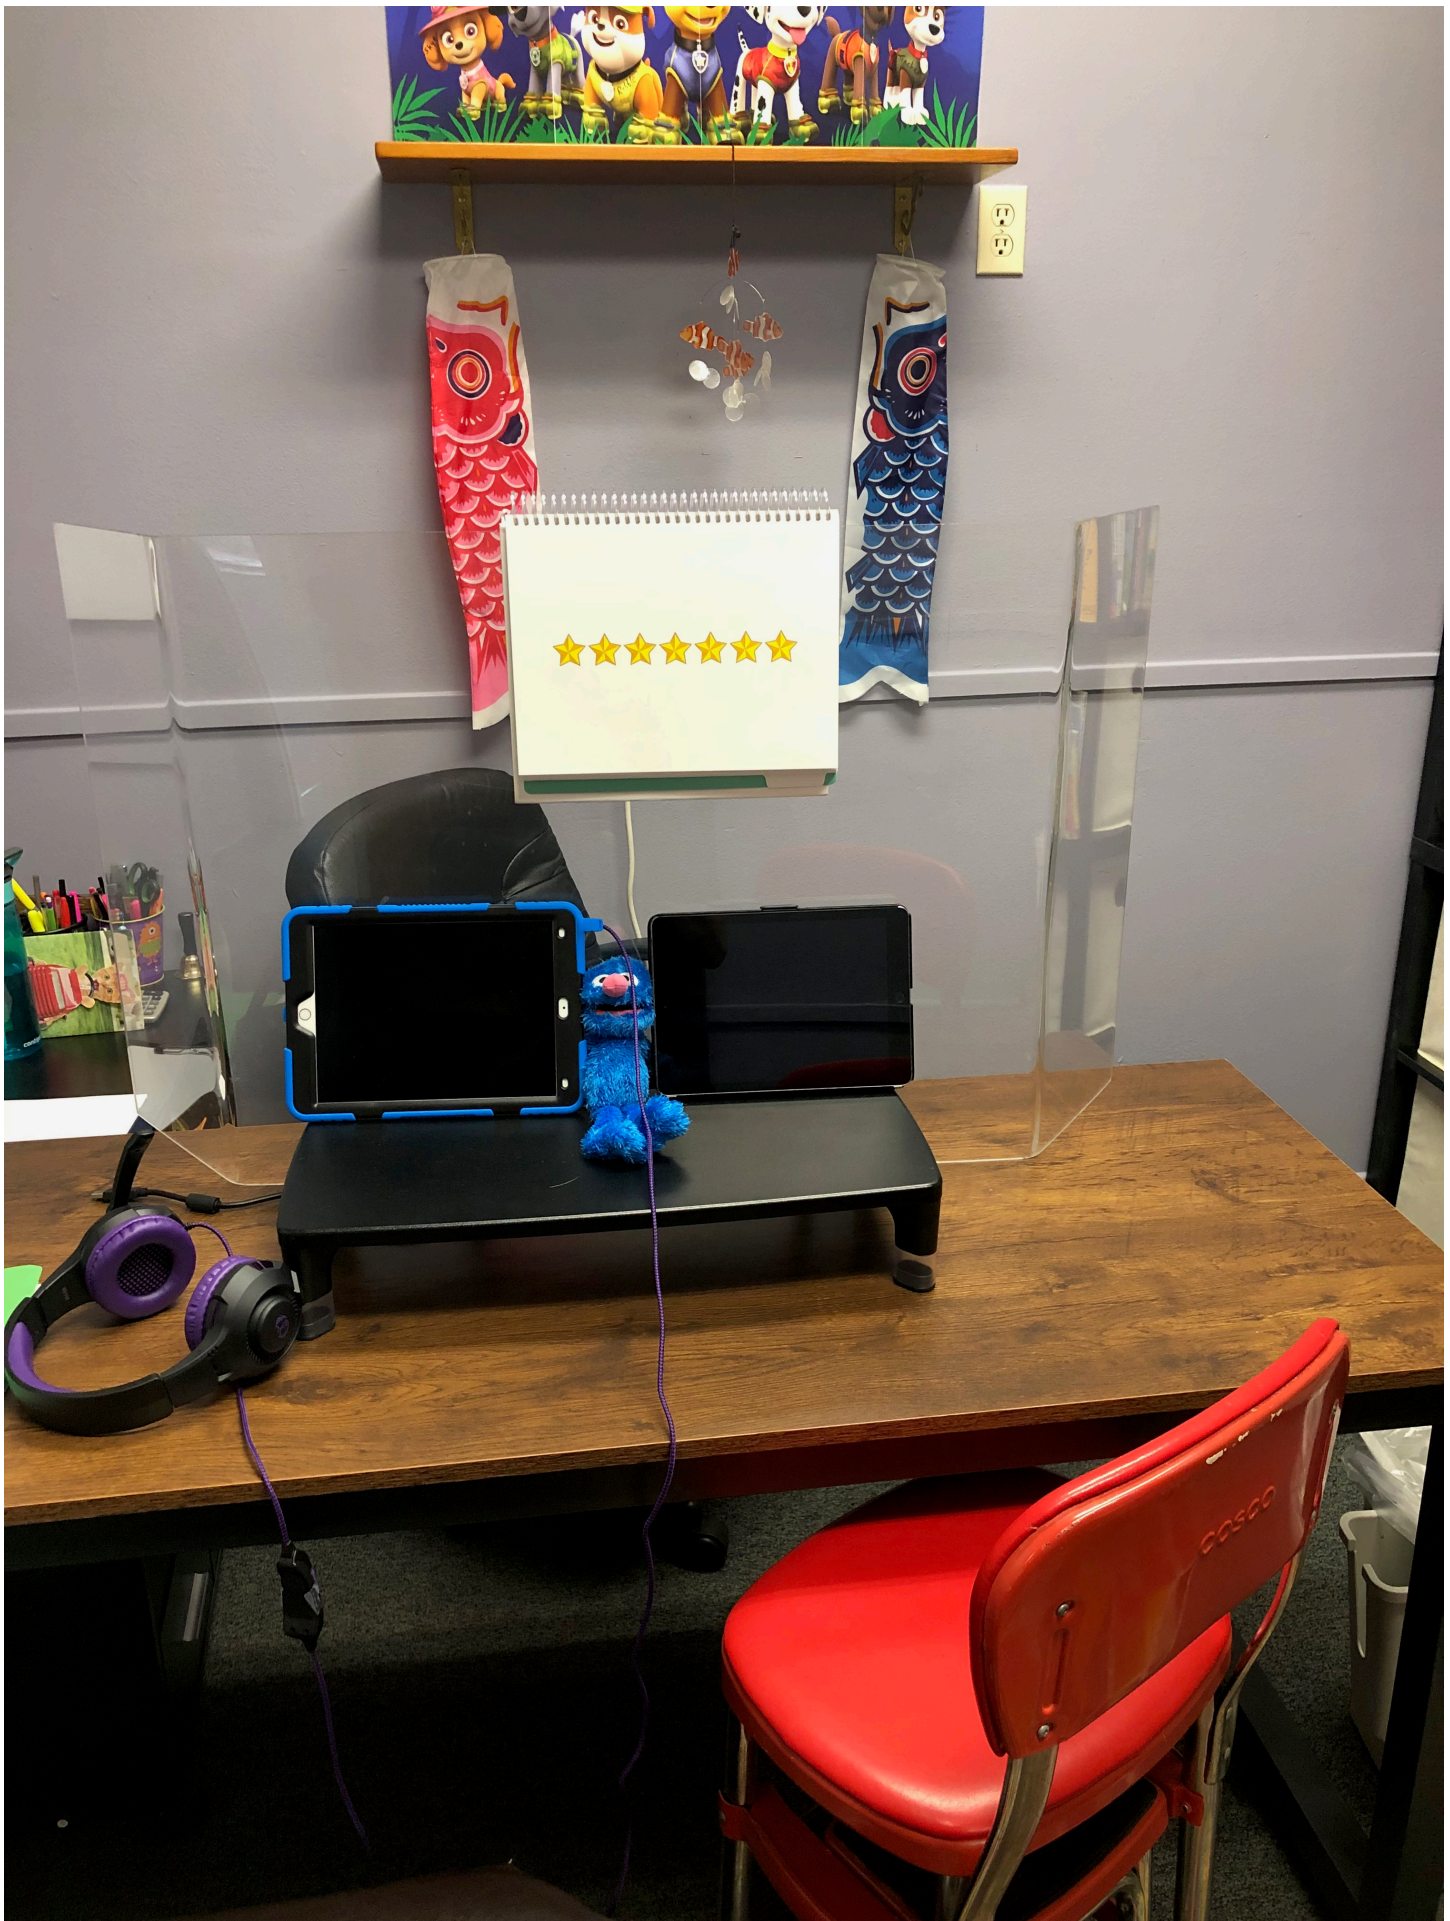





15.
